# Supplementary material for: Density Functional Study of Electrocatalytic Carbon Dioxide Reduction in Fourth-Period Transition Metal–Tetrahydroxyquinone Organic Framework
Source: MDPI journal article supplement (doi:10.3390/molecules29102320), 2024-05-15
Supplement: s1 [file s1]

# Density Functional Study of Electrocatalytic Carbon Dioxide Reduction in Fourth-period Transition Metal-Tetrahydroxyquinone Organic Framework

Yufeng Wen<sup>1</sup>, Xianshi Zeng<sup>1</sup>, Yanan Xiao<sup>1</sup>, Wen Ruan<sup>1</sup>, Kai Xiong<sup>2,3</sup>, Zhangli Lai<sup>1\*</sup>

1 School of Mathematical Sciences and Physics, Jinggangshan University, Ji'an 343009, China;  
jgsuwyf@sina.com(Y,W); zengxueliang@163.com(X,Z); yan anxiao06@163.com(Y,X) ;  
ruanwen@jgsu.edu.cn(W,R)

2 Materials Genome Institute, National Center for International Research on Photoelectric and  
Energy Materials, School of Materials and Energy, Yunnan University, Kunming 650091, China;  
xiongkai@ynu.edu.cn(K,X)

3 Advanced Computing Center, Information Technology Center, Yunnan University, Kunming  
650091, China.

\* Correspondence: laizhangli@jgsu.edu.cn

Table S. 1  $E_b$  is the binding energy between the TM and the TM-THQ,  $E_c$  is the cohesive energy of the bulk TM,  $E_f$  denotes the formation energy of TM-THQ catalysts.

| TM | $E_b$ (eV) | $E_c$ (eV) | $E_f$ (eV) |
|----|------------|------------|------------|
| Y  | -11.100    | -5.823     | -25.382    |
| Zr | -13.295    | -7.918     | -20.721    |
| Nb | -10.145    | -8.576     | -14.119    |
| Mo | -8.821     | -7.633     | -7.894     |
| Tc | -7.820     | -8.222     | -8.876     |
| Ru | -7.113     | -7.968     | -9.530     |
| Rh | -6.047     | -7.435     | -9.366     |
| Pd | -4.354     | -4.592     | -9.784     |
| Ag | -3.130     | -4.192     | -7.835     |
| Cd | -3.163     | -1.118     | -15.976    |

Table S. 2 Gibbs free energy change ( $\Delta G/\text{eV}$ ) of the first protonation step in the  $\text{CO}_2$  reduction reaction ( $\text{CO}_2\text{RR}$ ) and  $\text{H}_2$  evolution reaction (HER) on the TM–THQ

| TM | $\Delta G[\text{*H}]$ | $\Delta G^*\text{COOH}$ | $\Delta G^*\text{OCHO}$ |
|----|-----------------------|-------------------------|-------------------------|
| Y  | 0.777                 | 0.981                   | -0.471                  |
| Zr | -0.151                | 2.168                   | -1.087                  |
| Nb | -0.436                | -0.448                  | -1.067                  |
| Mo | -0.347                | -0.130                  | -0.409                  |
| Tc | -0.513                | -0.476                  | -0.174                  |
| Ru | -0.516                | -0.658                  | 0.008                   |
| Rh | -0.323                | -0.233                  | 0.686                   |
| Pd | 0.669                 | 0.564                   | 1.120                   |
| Ag | 1.054                 | 0.731                   | 0.715                   |
| Cd | 0.766                 | 0.882                   | 0.384                   |

Table S. 3 Adsorption energy of TM-THQ on  $\text{C}_1$  product

| TM | CO     | HCOOH  | HCHO   | $\text{CH}_3\text{OH}$ | $\text{CH}_4$ |
|----|--------|--------|--------|------------------------|---------------|
| Y  | -0.503 | -0.807 | -0.654 | -0.916                 | -0.107        |
| Zr | -1.019 | -1.213 | -1.186 | -1.352                 | -0.301        |
| Nb | -1.559 | -1.537 | -1.219 | -1.085                 | -0.093        |
| Mo | -1.597 | -0.926 | -0.808 | -1.013                 | -0.466        |
| Tc | -1.109 | -0.811 | -0.999 | -0.973                 | -0.156        |
| Ru | -1.987 | -0.766 | -0.821 | -0.856                 | -0.287        |
| Rh | -1.031 | -0.456 | -0.606 | -0.714                 | -0.358        |
| Pd | -0.247 | -0.213 | -0.269 | -0.357                 | -0.164        |
| Ag | -0.671 | -0.596 | -0.659 | -0.655                 | -0.542        |
| Cd | -0.537 | -0.702 | -0.663 | -0.815                 | -0.364        |

Table S. 4 Pd-THQ electrocatalytic  $\text{CO}_2$  reduction steps for each intermediate and Gibbs free energy variation.

| $n(\text{H}^+ + \text{e}^-)$ transferred | Chemical reaction equation                                                                               | $\Delta G$ |
|------------------------------------------|----------------------------------------------------------------------------------------------------------|------------|
| 1                                        | $* + \text{CO}_2 + \text{H}^+ + \text{e}^- \rightarrow *\text{COOH}$                                     | 0.564      |
|                                          | $* + \text{CO}_2 + \text{H}^+ + \text{e}^- \rightarrow *\text{OCHO}$                                     | 1.120      |
| 2                                        | $*\text{COOH} + \text{H}^+ + \text{e}^- \rightarrow *\text{CO} + \text{H}_2\text{O}$                     | -0.300     |
| 3                                        | $*\text{CO} + \text{H}_2\text{O} + \text{H}^+ + \text{e}^- \rightarrow *\text{CHO} + \text{H}_2\text{O}$ | 0.734      |
|                                          | $*\text{CO} + \text{H}_2\text{O} + \text{H}^+ + \text{e}^- \rightarrow *\text{COH} + \text{H}_2\text{O}$ | 1.394      |
|                                          | $*\text{CO} + \text{H}_2\text{O} \rightarrow * + \text{CO} + \text{H}_2\text{O}$                         | 0.387      |

Table S. 5 Mo-THQ electrocatalytic CO<sub>2</sub> reduction steps for each intermediate and Gibbs free energy variation.

| n(H <sup>+</sup> +e <sup>-</sup> )transferred | Chemical reaction equation                                                                                                             | ΔG     |
|-----------------------------------------------|----------------------------------------------------------------------------------------------------------------------------------------|--------|
| 1                                             | * + CO <sub>2</sub> + H <sup>+</sup> + e <sup>-</sup> → *COOH                                                                          | -0.130 |
|                                               | * + CO <sub>2</sub> + H <sup>+</sup> + e <sup>-</sup> → *OCHO                                                                          | -0.409 |
| 2                                             | *COOH + H <sup>+</sup> + e <sup>-</sup> → *CO + H <sub>2</sub> O                                                                       | -0.291 |
|                                               | *OCHO + H <sup>+</sup> + e <sup>-</sup> → *OCHOH                                                                                       | -0.251 |
| 3                                             | *CO + H <sub>2</sub> O + H <sup>+</sup> + e <sup>-</sup> → *CHO + H <sub>2</sub> O                                                     | 0.475  |
|                                               | *CO + H <sub>2</sub> O + H <sup>+</sup> + e <sup>-</sup> → *COH + H <sub>2</sub> O                                                     | 0.805  |
|                                               | *OCHOH + H <sup>+</sup> + e <sup>-</sup> → *CHO + H <sub>2</sub> O                                                                     | 0.713  |
|                                               | *OCHOH + H <sup>+</sup> + e <sup>-</sup> → *OCH + H <sub>2</sub> O                                                                     | 2.323  |
|                                               | *OCHOH → * + HCOOH                                                                                                                     | 1.005  |
| 4                                             | *CHO + H <sub>2</sub> O + H <sup>+</sup> + e <sup>-</sup> → *OCH <sub>2</sub> + H <sub>2</sub> O                                       | -0.404 |
|                                               | *COH + H <sub>2</sub> O + H <sup>+</sup> + e <sup>-</sup> → *C + 2H <sub>2</sub> O                                                     | 1.595  |
| 5                                             | *OCH <sub>2</sub> + H <sub>2</sub> O + H <sup>+</sup> + e <sup>-</sup> → *OCH <sub>3</sub> + H <sub>2</sub> O                          | -1.038 |
|                                               | *OCH <sub>2</sub> + H <sub>2</sub> O + H <sup>+</sup> + e <sup>-</sup> → * + HCHO + H <sub>2</sub> O + H <sup>+</sup> + e <sup>-</sup> | 0.718  |
| 6                                             | *OCH <sub>3</sub> + H <sub>2</sub> O + H <sup>+</sup> + e <sup>-</sup> → *CH <sub>3</sub> OH + H <sub>2</sub> O                        | 0.139  |
|                                               | *OCH <sub>3</sub> + H <sub>2</sub> O + H <sup>+</sup> + e <sup>-</sup> → *O + CH <sub>4</sub> + H <sub>2</sub> O                       | -1.229 |
| 7                                             | *O + CH <sub>4</sub> + H <sub>2</sub> O + H <sup>+</sup> + e <sup>-</sup> → *OH + CH <sub>4</sub> + H <sub>2</sub> O                   | 0.043  |
|                                               | *CH <sub>3</sub> OH + H <sub>2</sub> O + H <sup>+</sup> + e <sup>-</sup> → *OH + CH <sub>4</sub> + H <sub>2</sub> O                    | -1.326 |
| 8                                             | *OH + CH <sub>4</sub> + H <sub>2</sub> O + H <sup>+</sup> + e <sup>-</sup> → * + CH <sub>4</sub> + 2H <sub>2</sub> O                   | 0.853  |

Table S. 6 Y-THQ、Ag-THQ、Cd-THQ electrocatalytic CO<sub>2</sub> reduction steps for each intermediate and Gibbs free energy variation。

| catalysts | n(H <sup>+</sup> +e <sup>-</sup> )transferred | Chemical reaction equation                                         | ΔG     |
|-----------|-----------------------------------------------|--------------------------------------------------------------------|--------|
| Y-THQ     | 1                                             | * + CO <sub>2</sub> + H <sup>+</sup> + e <sup>-</sup> → *COOH      | 0.981  |
|           |                                               | * + CO <sub>2</sub> + H <sup>+</sup> + e <sup>-</sup> → *OCHO      | -0.471 |
|           | 2                                             | *OCHO + H <sup>+</sup> + e <sup>-</sup> → *OCHOH                   | 0.138  |
|           | 3                                             | *OCHOH + H <sup>+</sup> + e <sup>-</sup> → *CHO + H <sub>2</sub> O | 1.471  |
|           |                                               | *OCHOH + H <sup>+</sup> + e <sup>-</sup> → *OCH + H <sub>2</sub> O | 1.576  |
|           |                                               | *OCHOH → * + HCOOH                                                 | 0.699  |
| Ag-THQ    | 1                                             | * + CO <sub>2</sub> + H <sup>+</sup> + e <sup>-</sup> → *COOH      | 0.731  |
|           |                                               | * + CO <sub>2</sub> + H <sup>+</sup> + e <sup>-</sup> → *OCHO      | 0.714  |
|           | 2                                             | *OCHO + H <sup>+</sup> + e <sup>-</sup> → *OCHOH                   | -1.337 |
|           | 3                                             | *OCHOH + H <sup>+</sup> + e <sup>-</sup> → *CHO + H <sub>2</sub> O | 1.212  |
|           |                                               | *OCHOH + H <sup>+</sup> + e <sup>-</sup> → *OCH + H <sub>2</sub> O | 1.349  |
|           |                                               | *OCHOH → * + HCOOH                                                 | 0.546  |
| Cd-THQ    | 1                                             | * + CO <sub>2</sub> + H <sup>+</sup> + e <sup>-</sup> → *COOH      | 0.882  |
|           |                                               | * + CO <sub>2</sub> + H <sup>+</sup> + e <sup>-</sup> → *OCHO      | 0.384  |
|           | 2                                             | *OCHO + H <sup>+</sup> + e <sup>-</sup> → *OCHOH                   | -0.771 |
|           | 3                                             | *OCHOH + H <sup>+</sup> + e <sup>-</sup> → *CHO + H <sub>2</sub> O | 1.077  |
|           |                                               | *OCHOH + H <sup>+</sup> + e <sup>-</sup> → *OCH + H <sub>2</sub> O | 0.968  |
|           |                                               | *OCHOH → * + HCOOH                                                 | 0.587  |

Table S. 7 Zr-THQ electrocatalytic CO<sub>2</sub> reduction steps for each intermediate and Gibbs free energy variation.

| n(H <sup>+</sup> +e <sup>-</sup> )transferred | Chemical reaction equation                                                                                           | ΔG     |
|-----------------------------------------------|----------------------------------------------------------------------------------------------------------------------|--------|
| 1                                             | * + CO <sub>2</sub> + H <sup>+</sup> + e <sup>-</sup> → *COOH                                                        | 2.167  |
|                                               | * + CO <sub>2</sub> + H <sup>+</sup> + e <sup>-</sup> → *OCHO                                                        | -1.086 |
| 2                                             | *OCHO + H <sup>+</sup> + e <sup>-</sup> → *OCHOH                                                                     | 0.269  |
| 3                                             | *OCHOH + H <sup>+</sup> + e <sup>-</sup> → *CHO + H <sub>2</sub> O                                                   | 1.083  |
|                                               | *OCHOH + H <sup>+</sup> + e <sup>-</sup> → *OCH + H <sub>2</sub> O                                                   | 2.054  |
| 4                                             | *CHO + H <sub>2</sub> O + H <sup>+</sup> + e <sup>-</sup> → *OCH <sub>2</sub> + H <sub>2</sub> O                     | -0.988 |
| 5                                             | *OCH <sub>2</sub> + H <sub>2</sub> O + H <sup>+</sup> + e <sup>-</sup> → *OCH <sub>3</sub> + H <sub>2</sub> O        | -1.211 |
| 6                                             | *OCH <sub>3</sub> + H <sub>2</sub> O + H <sup>+</sup> + e <sup>-</sup> → *CH <sub>3</sub> OH + H <sub>2</sub> O      | 0.087  |
|                                               | *OCH <sub>3</sub> + H <sub>2</sub> O + H <sup>+</sup> + e <sup>-</sup> → *O + CH <sub>4</sub> + H <sub>2</sub> O     | -0.103 |
| 7                                             | *O + CH <sub>4</sub> + H <sub>2</sub> O + H <sup>+</sup> + e <sup>-</sup> → *OH + CH <sub>4</sub> + H <sub>2</sub> O | -1.069 |
|                                               | *CH <sub>3</sub> OH + H <sub>2</sub> O + H <sup>+</sup> + e <sup>-</sup> → *OH + CH <sub>4</sub> + H <sub>2</sub> O  | -1.261 |
| 8                                             | *OH + CH <sub>4</sub> + H <sub>2</sub> O + H <sup>+</sup> + e <sup>-</sup> → * + CH <sub>4</sub> + 2H <sub>2</sub> O | 1.212  |

Table S. 8 Nb-THQ electrocatalytic CO<sub>2</sub> reduction steps for each intermediate and Gibbs free energy variation.

| n(H <sup>+</sup> +e <sup>-</sup> )transferred | Chemical reaction equation                                                                                           | ΔG     |
|-----------------------------------------------|----------------------------------------------------------------------------------------------------------------------|--------|
| 1                                             | * + CO <sub>2</sub> + H <sup>+</sup> + e <sup>-</sup> → *COOH                                                        | -0.447 |
|                                               | * + CO <sub>2</sub> + H <sup>+</sup> + e <sup>-</sup> → *OCHO                                                        | -1.066 |
| 2                                             | *COOH + H <sup>+</sup> + e <sup>-</sup> → *CO + H <sub>2</sub> O                                                     | -0.499 |
|                                               | *OCHO + H <sup>+</sup> + e <sup>-</sup> → *OCHOH                                                                     | 0.196  |
| 3                                             | *CO + H <sub>2</sub> O + H <sup>+</sup> + e <sup>-</sup> → *CHO + H <sub>2</sub> O                                   | 0.272  |
|                                               | *CO + H <sub>2</sub> O + H <sup>+</sup> + e <sup>-</sup> → *COH + H <sub>2</sub> O                                   | 1.265  |
|                                               | *OCHOH + H <sup>+</sup> + e <sup>-</sup> → *CHO + H <sub>2</sub> O                                                   | 0.195  |
|                                               | *OCHOH + H <sup>+</sup> + e <sup>-</sup> → *OCH + H <sub>2</sub> O                                                   | 1.572  |
| 4                                             | *CHO + H <sub>2</sub> O + H <sup>+</sup> + e <sup>-</sup> → *OCH <sub>2</sub> + H <sub>2</sub> O                     | -0.341 |
| 5                                             | *OCH <sub>2</sub> + H <sub>2</sub> O + H <sup>+</sup> + e <sup>-</sup> → *OCH <sub>3</sub> + H <sub>2</sub> O        | -1.244 |
| 6                                             | *OCH <sub>3</sub> + H <sub>2</sub> O + H <sup>+</sup> + e <sup>-</sup> → *CH <sub>3</sub> OH + H <sub>2</sub> O      | 0.398  |
|                                               | *OCH <sub>3</sub> + H <sub>2</sub> O + H <sup>+</sup> + e <sup>-</sup> → *O + CH <sub>4</sub> + H <sub>2</sub> O     | -0.982 |
| 7                                             | *O + CH <sub>4</sub> + H <sub>2</sub> O + H <sup>+</sup> + e <sup>-</sup> → *OH + CH <sub>4</sub> + H <sub>2</sub> O | -0.264 |
| 8                                             | *OH + CH <sub>4</sub> + H <sub>2</sub> O + H <sup>+</sup> + e <sup>-</sup> → * + CH <sub>4</sub> + 2H <sub>2</sub> O | 0.883  |

Table S. 9 Tc-THQ electrocatalytic CO<sub>2</sub> reduction steps for each intermediate and Gibbs free energy variation.

| n(H <sup>+</sup> +e <sup>-</sup> )transferred | Chemical reaction equation                                                                                                             | ΔG     |
|-----------------------------------------------|----------------------------------------------------------------------------------------------------------------------------------------|--------|
| 1                                             | * + CO <sub>2</sub> + H <sup>+</sup> + e <sup>-</sup> → *COOH                                                                          | -0.475 |
|                                               | * + CO <sub>2</sub> + H <sup>+</sup> + e <sup>-</sup> → *OCHO                                                                          | -0.174 |
| 2                                             | *COOH + H <sup>+</sup> + e <sup>-</sup> → *CO + H <sub>2</sub> O                                                                       | -0.613 |
|                                               | *OCHO + H <sup>+</sup> + e <sup>-</sup> → *OCHOH                                                                                       | -0.357 |
| 3                                             | *CO + H <sub>2</sub> O + H <sup>+</sup> + e <sup>-</sup> → *CHO + H <sub>2</sub> O                                                     | 0.422  |
|                                               | *CO + H <sub>2</sub> O + H <sup>+</sup> + e <sup>-</sup> → *COH + H <sub>2</sub> O                                                     | 0.880  |
|                                               | *OCHOH + H <sup>+</sup> + e <sup>-</sup> → *CHO + H <sub>2</sub> O                                                                     | -0.135 |
|                                               | *OCHOH + H <sup>+</sup> + e <sup>-</sup> → *OCH + H <sub>2</sub> O                                                                     | 1.822  |
|                                               | *OCHOH → * + HCOOH                                                                                                                     | 0.664  |
| 4                                             | *CHO + H <sub>2</sub> O + H <sup>+</sup> + e <sup>-</sup> → *OCH <sub>2</sub> + H <sub>2</sub> O                                       | 0.174  |
| 5                                             | *OCH <sub>2</sub> + H <sub>2</sub> O + H <sup>+</sup> + e <sup>-</sup> → *OCH <sub>3</sub> + H <sub>2</sub> O                          | -0.761 |
|                                               | *OCH <sub>2</sub> + H <sub>2</sub> O + H <sup>+</sup> + e <sup>-</sup> → * + HCHO + H <sub>2</sub> O + H <sup>+</sup> + e <sup>-</sup> | 0.801  |
| 6                                             | *OCH <sub>3</sub> + H <sub>2</sub> O + H <sup>+</sup> + e <sup>-</sup> → *CH <sub>3</sub> OH + H <sub>2</sub> O                        | -0.168 |
|                                               | *OCH <sub>3</sub> + H <sub>2</sub> O + H <sup>+</sup> + e <sup>-</sup> → *O + CH <sub>4</sub> + H <sub>2</sub> O                       | -0.646 |
| 7                                             | *O + CH <sub>4</sub> + H <sub>2</sub> O + H <sup>+</sup> + e <sup>-</sup> → *OH + CH <sub>4</sub> + H <sub>2</sub> O                   | -0.376 |
|                                               | *CH <sub>3</sub> OH + H <sub>2</sub> O + H <sup>+</sup> + e <sup>-</sup> → *OH + CH <sub>4</sub> + H <sub>2</sub> O                    | -0.855 |
| 8                                             | *OH + CH <sub>4</sub> + H <sub>2</sub> O + H <sup>+</sup> + e <sup>-</sup> → * + CH <sub>4</sub> + 2H <sub>2</sub> O                   | 0.373  |

Table S. 10 Ru-THQ electrocatalytic CO<sub>2</sub> reduction steps for each intermediate and Gibbs free energy variation.

| n(H <sup>+</sup> +e <sup>-</sup> )transferred | Chemical reaction equation                                                                                                             | ΔG     |
|-----------------------------------------------|----------------------------------------------------------------------------------------------------------------------------------------|--------|
| 1                                             | * + CO <sub>2</sub> + H <sup>+</sup> + e <sup>-</sup> → *COOH                                                                          | -0.658 |
|                                               | * + CO <sub>2</sub> + H <sup>+</sup> + e <sup>-</sup> → *OCHO                                                                          | 0.008  |
| 2                                             | *COOH + H <sup>+</sup> + e <sup>-</sup> → *CO + H <sub>2</sub> O                                                                       | -0.589 |
|                                               | *OCHO + H <sup>+</sup> + e <sup>-</sup> → *OCHOH                                                                                       | -0.624 |
| 3                                             | *CO + H <sub>2</sub> O + H <sup>+</sup> + e <sup>-</sup> → *CHO + H <sub>2</sub> O                                                     | 0.190  |
|                                               | *CO + H <sub>2</sub> O + H <sup>+</sup> + e <sup>-</sup> → *COH + H <sub>2</sub> O                                                     | 1.136  |
|                                               | *OCHOH + H <sup>+</sup> + e <sup>-</sup> → *CHO + H <sub>2</sub> O                                                                     | -0.440 |
|                                               | *OCHOH + H <sup>+</sup> + e <sup>-</sup> → *OCH + H <sub>2</sub> O                                                                     | 0.992  |
|                                               | *OCHOH → * + HCOOH                                                                                                                     | 0.540  |
| 4                                             | *CHO + H <sub>2</sub> O + H <sup>+</sup> + e <sup>-</sup> → *OCH <sub>2</sub> + H <sub>2</sub> O                                       | 0.358  |
| 5                                             | *OCH <sub>2</sub> + H <sub>2</sub> O + H <sup>+</sup> + e <sup>-</sup> → *OCH <sub>3</sub> + H <sub>2</sub> O                          | -0.448 |
|                                               | *OCH <sub>2</sub> + H <sub>2</sub> O + H <sup>+</sup> + e <sup>-</sup> → * + HCHO + H <sub>2</sub> O + H <sup>+</sup> + e <sup>-</sup> | 0.520  |
| 6                                             | *OCH <sub>3</sub> + H <sub>2</sub> O + H <sup>+</sup> + e <sup>-</sup> → *CH <sub>3</sub> OH + H <sub>2</sub> O                        | -0.514 |
|                                               | *OCH <sub>3</sub> + H <sub>2</sub> O + H <sup>+</sup> + e <sup>-</sup> → *O + CH <sub>4</sub> + H <sub>2</sub> O                       | -0.073 |
| 7                                             | *O + CH <sub>4</sub> + H <sub>2</sub> O + H <sup>+</sup> + e <sup>-</sup> → *OH + CH <sub>4</sub> + H <sub>2</sub> O                   | -1.029 |
|                                               | *CH <sub>3</sub> OH + H <sub>2</sub> O + H <sup>+</sup> + e <sup>-</sup> → *OH + CH <sub>4</sub> + H <sub>2</sub> O                    | -0.587 |
|                                               | *CH <sub>3</sub> OH + H <sub>2</sub> O → * + CH <sub>3</sub> OH + H <sub>2</sub> O                                                     | 0.527  |
| 8                                             | *OH + CH <sub>4</sub> + H <sub>2</sub> O + H <sup>+</sup> + e <sup>-</sup> → * + CH <sub>4</sub> + 2H <sub>2</sub> O                   | -0.333 |

Table S. 11 Rh-THQ electrocatalytic CO<sub>2</sub> reduction steps for each intermediate and Gibbs free energy variation.

| n(H <sup>+</sup> +e <sup>-</sup> )transferred | Chemical reaction equation                                                                                                             | ΔG     |
|-----------------------------------------------|----------------------------------------------------------------------------------------------------------------------------------------|--------|
| 1                                             | * + CO <sub>2</sub> + H <sup>+</sup> + e <sup>-</sup> → *COOH                                                                          | -0.233 |
|                                               | * + CO <sub>2</sub> + H <sup>+</sup> + e <sup>-</sup> → *OCHO                                                                          | 0.686  |
| 2                                             | *COOH + H <sup>+</sup> + e <sup>-</sup> → *CO + H <sub>2</sub> O                                                                       | 0.208  |
| 3                                             | *CO + H <sub>2</sub> O + H <sup>+</sup> + e <sup>-</sup> → *CHO + H <sub>2</sub> O                                                     | -0.496 |
|                                               | *CO + H <sub>2</sub> O + H <sup>+</sup> + e <sup>-</sup> → *COH + H <sub>2</sub> O                                                     | 1.169  |
| 4                                             | *CHO + H <sub>2</sub> O + H <sup>+</sup> + e <sup>-</sup> → *OCH <sub>2</sub> + H <sub>2</sub> O                                       | 0.348  |
| 5                                             | *OCH <sub>2</sub> + H <sub>2</sub> O + H <sup>+</sup> + e <sup>-</sup> → *OCH <sub>3</sub> + H <sub>2</sub> O                          | -0.006 |
|                                               | *OCH <sub>2</sub> + H <sub>2</sub> O + H <sup>+</sup> + e <sup>-</sup> → * + HCHO + H <sub>2</sub> O + H <sup>+</sup> + e <sup>-</sup> | 0.510  |
| 6                                             | *OCH <sub>3</sub> + H <sub>2</sub> O + H <sup>+</sup> + e <sup>-</sup> → *CH <sub>3</sub> OH + H <sub>2</sub> O                        | -1.041 |
|                                               | *OCH <sub>3</sub> + H <sub>2</sub> O + H <sup>+</sup> + e <sup>-</sup> → *O + CH <sub>4</sub> + H <sub>2</sub> O                       | 0.589  |
| 7                                             | *CH <sub>3</sub> OH + H <sub>2</sub> O + H <sup>+</sup> + e <sup>-</sup> → *OH + CH <sub>4</sub> + H <sub>2</sub> O                    | -0.050 |
|                                               | *CH <sub>3</sub> OH + H <sub>2</sub> O → * + CH <sub>3</sub> OH + H <sub>2</sub> O                                                     | 0.405  |
| 8                                             | *OH + CH <sub>4</sub> + H <sub>2</sub> O + H <sup>+</sup> + e <sup>-</sup> → * + CH <sub>4</sub> + 2H <sub>2</sub> O                   | -0.824 |

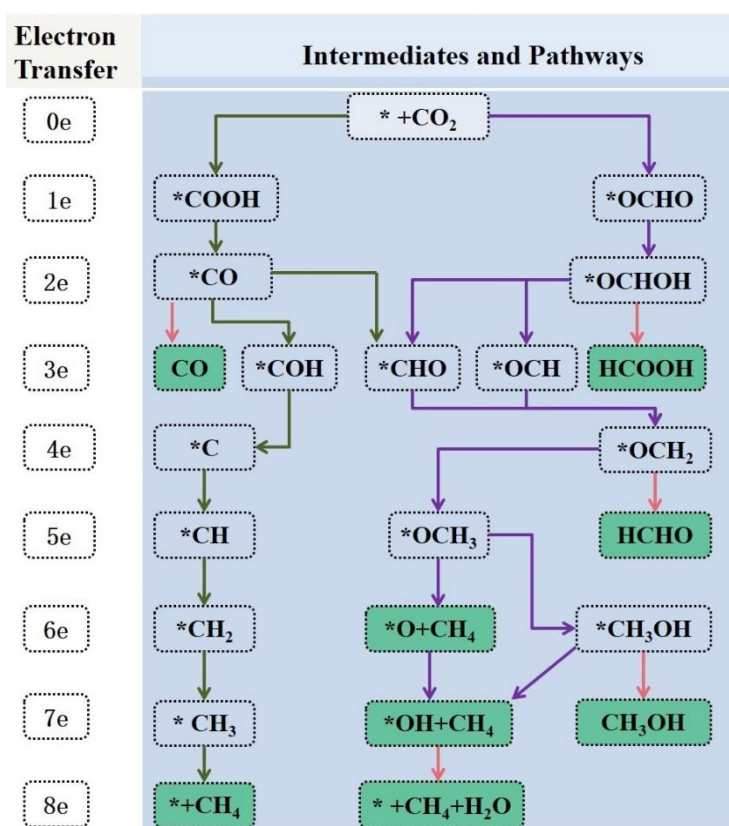

Figure S 1 TM-THQ electrocatalytic CO<sub>2</sub> reduction for each electronic step and reaction pathway. The reaction starts with \*+CO<sub>2</sub>, where \* denotes the catalyst and the green box is the products<sup>[1-5]</sup>.



Table S. 12 Structural modelling of each intermediate in TM-THQ electrocatalytic carbon dioxide reduction.

| n(H <sup>+</sup> +e <sup>-</sup> ) transferred | Intermediates for each electron transfer step                                       |                                                                                     |                                                                                       |
|------------------------------------------------|-------------------------------------------------------------------------------------|-------------------------------------------------------------------------------------|---------------------------------------------------------------------------------------|
| 1                                              | 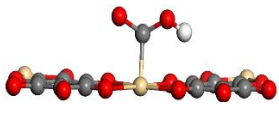   |    |                                                                                       |
|                                                | *COOH                                                                               | *OCHO                                                                               |                                                                                       |
| 2                                              |    |    |                                                                                       |
|                                                | *CO                                                                                 | *OCHOH                                                                              |                                                                                       |
| 3                                              |    |    |    |
|                                                | *COH                                                                                | *CHO                                                                                | *OCH                                                                                  |
| 4                                              |   |   |                                                                                       |
|                                                | *C                                                                                  | *OCH <sub>2</sub>                                                                   |                                                                                       |
| 5                                              |  |  |                                                                                       |
|                                                | *CH                                                                                 | *OCH <sub>3</sub>                                                                   |                                                                                       |
| 6                                              |  |  |  |
|                                                | *CH <sub>2</sub>                                                                    | *O                                                                                  | *CH <sub>3</sub> OH                                                                   |
| 7                                              |  |  |                                                                                       |
|                                                | *CH <sub>3</sub>                                                                    | *OH                                                                                 |                                                                                       |

## Reference

- 
- [1] Zeng, X.; Liao, L.; Wang, M.; Wang, H. Rare-earth metal-N<sub>6</sub> centers in porous carbon for electrocatalytic CO<sub>2</sub> reduction. *Physical chemistry chemical physics : PCCP* **2023**, 25, 20381–20394
- [2] Liu, J.H.; Yang, L.; Ganz, E. Electrocatalytic reduction of CO<sub>2</sub> by two-dimensional transition metal porphyrin sheets. *Journal of Materials Chemistry A* **2019**, 7, 11944–11952.
- [3] Zeng, X.; Liao, L.; Wang, M.; Wang, H. Density functional calculation of two-dimensional transition

---

metal-hexaiminotriphenylene (TM-HITP) electrocatalytic CO<sub>2</sub> reduction. *Catalysis Science Technology* **2023**, pp. 5351–5364

- [4] Zeng, X.; Liao, L.; Yu, Q.; Wang, M.; Wang, H. Theoretical Prediction of Electrocatalytic Reduction of CO<sub>2</sub> Using a 2D Catalyst Composed of 3d Transition Metal and Hexamine Dipyrazino Quinoxaline. *Chemistry* **2023**, p. e202302232
- [5] Zeng, X.; Tu, Z.J.; Yuan, Y.; Liao, L.; Xiao, C.; Wen, Y.; Xiong, K. Two-Dimensional Transition Metal-Hexaaminobenzene Monolayer Single-Atom Catalyst for Electrocatalytic Carbon Dioxide Reduction. *Nanomaterials* **2022**, 12, 4005.
